# Supplementary material for: Impact of Genetic Risk Score and Dietary Protein Intake on Vitamin D Status in Young Adults from Brazil
Source: MDPI journal article supplement (doi:10.3390/nu14051015), 2022-02-28
Supplement: s1 [file s1]

Supplementary Table S1. Genotypic and allelic frequencies of the single nucleotide polymorphisms that were used to create the genetic risk score.

|                | Single Nucleotide Polymorphisms | Nucleotide Change | Total | Common Homozygous | Heterozygote | Rare Homozygous | Hardy Weinberg Equilibrium <i>p</i> Value | Minor Allele Frequency |
|----------------|---------------------------------|-------------------|-------|-------------------|--------------|-----------------|-------------------------------------------|------------------------|
| <i>VDR</i>     | rs2228570                       | T/C               | 195   | CC: 83            | TC: 89       | TT: 23          | 0.91                                      | T= 0.35                |
|                | rs7975232                       | C/A               | 200   | AA: 72            | CA: 92       | CC: 36          | 0.49                                      | C= 0.41                |
| <i>DHCR7</i>   | rs12785878                      | G/T               | 200   | TT: 48            | GT: 106      | GG: 46          | 0.40                                      | G= 0.50                |
| <i>CYP2R1</i>  | rs12794714                      | A/G               | 199   | GG: 72            | GA: 95       | AA: 32          | 0.94                                      | A= 0.40                |
| <i>CYP24A1</i> | rs6013897                       | A/T               | 200   | TT: 115           | TA: 73       | AA: 12          | 0.93                                      | A= 0.24                |
| <i>GC</i>      | rs2282679                       | C/A               | 199   | AA: 134           | CA: 59       | CC: 6           | 0.87                                      | C= 0.18                |
| <i>FTO</i>     | rs8050136                       | A/C               | 197   | CC: 71            | AC: 96       | AA: 30          | 0.79                                      | A= 0.40                |
|                | rs10163409                      | T/A               | 198   | AA: 117           | TA: 64       | TT: 17          | 0.06                                      | T= 0.25                |
| <i>TCF7L2</i>  | rs12255372                      | T/G               | 200   | GG: 85            | TG: 92       | TT: 23          | 0.80                                      | T= 0.35                |
|                | rs7903146                       | T/C               | 200   | CC: 90            | TC: 87       | TT: 23          | 0.78                                      | T= 0.33                |
| <i>MC4R</i>    | rs17782313                      | C/T               | 200   | TT: 139           | TC: 55       | CC: 6           | 0.84                                      | C= 0.17                |
| <i>KCNQ1</i>   | rs2237895                       | C/A               | 199   | AA: 85            | CA: 91       | CC: 23          | 0.86                                      | C= 0.34                |
|                | rs2237892                       | T/C               | 200   | CC: 160           | TC: 35       | TT: 5           | 0.08                                      | T= 0.11                |
| <i>CDKN2A/</i> | rs10811661                      | C/T               | 200   | TT: 151           | CT: 45       | CC: 4           | 0.76                                      | C= 0.13                |

|               |           |     |     |         |        |       |      |         |
|---------------|-----------|-----|-----|---------|--------|-------|------|---------|
| <i>PPARG</i>  | rs1801282 | G/C | 200 | CC: 170 | GC: 30 | GG: 0 | 0.25 | G= 0.08 |
| <i>CAPN10</i> | rs5030952 | T/C | 200 | CC: 128 | TC: 66 | TT: 6 | 0.47 | T= 0.20 |

\*dbSNP database: <https://www.ncbi.nlm.nih.gov/snp/> [1]

#### Reference

1. National Center for Biotechnology Information. <https://www.ncbi.nlm.nih.gov/snp/>.

Supplementary Table S2. Interaction between metabolic-GRS and dietary factors on clinical and biochemical measurements.

| Clinical and Biochemical Parameters | Carbohydrates (g)<br><i>p</i> <sub>interaction</sub> | Protein (g)<br><i>p</i> <sub>interaction</sub> | Fat (g)<br><i>p</i> <sub>interaction</sub> | Fibre (g)<br><i>p</i> <sub>interaction</sub> |
|-------------------------------------|------------------------------------------------------|------------------------------------------------|--------------------------------------------|----------------------------------------------|
| 25-hydroxyvitamin D (ng/ml)         | 0.999                                                | 0.525                                          | 0.602                                      | 0.208                                        |
| BMI (kg/m <sup>2</sup> )            | 0.355                                                | 0.913                                          | 0.403                                      | 0.989                                        |
| WC (cm)                             | 0.997                                                | 0.349                                          | 0.839                                      | 0.734                                        |
| BFP (%)                             | 0.367                                                | 0.756                                          | 0.231                                      | 0.807                                        |
| Glucose (mg/dl)                     | 0.930                                                | 0.827                                          | 0.131                                      | 0.851                                        |
| HbA1c (ng/ml)                       | 0.694                                                | 0.392                                          | 0.438                                      | 0.792                                        |
| Fasting Insulin (uIU/ml)            | 0.079                                                | 0.537                                          | 0.641                                      | 0.750                                        |

All variables were log transformed except for body fat percentage values which were in normal distribution. All associations were adjusted for age, gender, sun exposure, total energy intake and BMI (except BMI which was not adjusted for when the outcome was BMI). Abbreviations: GRS: genetic risk score, BMI: body mass index, WC: waist circumference, BFP: body fat percentage, HbA1c: glycated haemoglobin.
